# Supplementary material for: Chemical Profiling of Two Italian Olea europaea (L.) Varieties Subjected to UV-B Stress
Source: MDPI journal article supplement (doi:10.3390/plants11050680), 2022-03-02
Supplement: s1 [file s1]

|                            | Apigenin 6,8-di-C-glucoside | b-hydroxy-verbascoside isomer 1 | b-hydroxy-verbascoside isomer 2 | Luteolin 7-O-rutinoside isomero 1 | Dihydroquercetin | Quercetin-3-O-glucoside | Quercetin-3-O-rutinoside | Luteolin 7-O-rutinoside isomero 2 | Luteolin 4'-methyl ether | Luteolin-7-O-glucoside | Luteolin   | Diosmetin isomer 1 | Apigenin    | Diosmetin isomer 2 | Diosmetin isomer 3 | Caffeoyl-6'-secologanoside | Apigenin-7-O-rutinoside |
|----------------------------|-----------------------------|---------------------------------|---------------------------------|-----------------------------------|------------------|-------------------------|--------------------------|-----------------------------------|--------------------------|------------------------|------------|--------------------|-------------|--------------------|--------------------|----------------------------|-------------------------|
| Control                    | 192.8±2.63                  | 137.3±4.47                      | 145.7±4.77                      | 177.4±11.5                        | 232.6±6.48       | 176.4±7.25              | 209.8±2.60               | 189.3±13.9                        | 189.7±5.30               | 209.2±19.6             | 337.9±15.2 | 255.0±5.42         | 211.16±5.33 | 218.5±7.45         | 175.5±8.22         | 223.2±3.45                 | 255.6±5.51              |
| Treated UVB                | 332.9±2.63                  | 390.1±4.47                      | 391.4±4.77                      | 295.7±15.2                        | 398.6±6.48       | 400.0±9.36              | 274.2±2.60               | 331.7±17.0                        | 366.0±5.30               | 354.3±25.9             | 519.2±15.2 | 389.7±5.42         | 392.9±5.33  | 378.9±7.45         | 420.5±8.22         | 299.2±3.45                 | 356.1±14.6              |
| <b>TREATMENT</b>           |                             |                                 |                                 |                                   |                  |                         |                          |                                   |                          |                        |            |                    |             |                    |                    |                            |                         |
| <i>p=</i>                  | 0.000                       | 0.000                           | 0.000                           | 0.000                             | 0.000            | 0.000                   | 0.000                    | 0.000                             | 0.000                    | 0.000                  | 0.000      | 0.000              | 0.000       | 0.000              | 0.000              | 0.000                      | 0.000                   |
| Seggianese                 | 242.8±2.63                  |                                 |                                 |                                   |                  |                         |                          |                                   | 274.7±5.30               |                        | 474.0±15.2 | 356.6±5.42         | 281.1       | 270.5±7.45         |                    |                            |                         |
| Giarraffa                  | 282.9±2.63                  |                                 |                                 |                                   |                  |                         |                          |                                   | 281.0±5.30               |                        | 383.1±15.2 | 288.1±5.42         | 323.0       | 327±7.45           |                    |                            |                         |
| <b>VARIETY</b>             |                             |                                 |                                 |                                   |                  |                         |                          |                                   |                          |                        |            |                    |             |                    |                    |                            |                         |
| <i>p=</i>                  | 0.000                       |                                 |                                 |                                   |                  |                         |                          |                                   | 0.410                    |                        | 0.000      | 0.000              | 0.000       | 0.000              |                    |                            |                         |
| Seggianese C               | 210.7±3.72                  |                                 |                                 |                                   |                  |                         |                          |                                   | 232.4±7.50               |                        | 461.6±21.5 | 333.9±7.67         | 233.7±7.54  | 228.7±10.5         |                    |                            |                         |
| Seggianese UVB             | 274.8±3.72                  |                                 |                                 |                                   |                  |                         |                          |                                   | 317.0±7.50               |                        | 486.5±21.5 | 379.4±7.67         | 328.6±7.54  | 312.1±10.5         |                    |                            |                         |
| Giarraffa C                | 174.9±3.72                  |                                 |                                 |                                   |                  |                         |                          |                                   | 147.0±7.50               |                        | 214.3±21.5 | 176.1±7.67         | 188.6±7.54  | 208.2±10.5         |                    |                            |                         |
| Giarraffa UVB              | 391.0±3.72                  |                                 |                                 |                                   |                  |                         |                          |                                   | 415.0±7.50               |                        | 552.0±21.5 | 400.1±7.67         | 457.3±7.54  | 445.7±10.5         |                    |                            |                         |
| <b>TREATMENT x VARIETY</b> |                             |                                 |                                 |                                   |                  |                         |                          |                                   |                          |                        |            |                    |             |                    |                    |                            |                         |
| <i>p=</i>                  | 0.000                       |                                 |                                 |                                   |                  |                         |                          |                                   | 0.000                    |                        | 0.000      | 0.000              | 0.000       | 0.000              |                    |                            |                         |
| T2                         | 227.5±3.72                  | 236.2±6.31                      | 239.1±6.75                      | 212.4±19.8                        | 245.2±9.16       | 254.0±10.3              | 219.2±3.68               | 244.5±19.6                        | 246.1±7.50               | 230.5±33.9             | 354.2±21.5 | 263.6±7.67         | 273.8±7.54  | 255.9±10.5         | 259.4±11.6         | 226.2±4.88                 | 241.1±7.79              |
| T4                         | 239.1±3.72                  | 261.3±6.31                      | 266.6±6.75                      | 254.4±16.2                        | 266.1±9.16       | 260.4±10.3              | 228.8±3.68               | 237.8±24.1                        | 260.7±7.50               | 254.6±33.9             | 422.3±21.5 | 286.6±7.67         | 277.6±7.54  | 270.1±10.5         | 262.0±11.6         | 241.9±4.88                 | 318.1±28.1              |
| T6                         | 274.5±3.72                  | 259.6±6.31                      | 262.5±6.75                      | 208.3±19.9                        | 323.9±9.16       | 288.2±5.92              | 224.5±3.68               | 224.2±24.1                        | 272.6±7.50               | 285.5±27.7             | 429.3±21.5 | 342.9±7.67         | 307.2±7.54  | 305.4±10.5         | 314.5±11.6         | 265.2±4.88                 | 306.2±7.79              |
| T8                         | 310.4±3.72                  | 297.7±6.31                      | 306.0±6.75                      | 271.1±19.9                        | 427.4±9.16       | 350.2±10.3              | 285.6±3.68               | 335.5±19.6                        | 332.1±7.50               | 356.4±33.9             | 508.6±21.5 | 396.3±7.67         | 349.7±7.54  | 363.5±10.5         | 356.0±11.6         | 311.3±4.88                 | 357.9±7.79              |
| <b>TIME</b>                |                             |                                 |                                 |                                   |                  |                         |                          |                                   |                          |                        |            |                    |             |                    |                    |                            |                         |
| <i>p=</i>                  | 0.000                       | 0.000                           | 0.000                           | 0.000                             | 0.000            | 0.000                   | 0.000                    | 0.002                             | 0.000                    | 0.000                  | 0.000      | 0.000              | 0.000       | 0.000              | 0.000              | 0.000                      | 0.000                   |
| <b>TREATMENT x TIME</b>    |                             |                                 |                                 |                                   |                  |                         |                          |                                   |                          |                        |            |                    |             |                    |                    |                            |                         |
| <i>p=</i>                  | 0.000                       | 0.000                           | 0.000                           | 0.011                             | 0.001            | 0.000                   | 0.000                    | 0.000                             | 0.000                    | 0.031                  | 0.043      | 0.000              | 0.000       | 0.000              | 0.000              | 0.000                      | 0.000                   |
| <b>VARIETY x TIME</b>      |                             |                                 |                                 |                                   |                  |                         |                          |                                   |                          |                        |            |                    |             |                    |                    |                            |                         |
| <i>p=</i>                  | 0.000                       |                                 |                                 |                                   |                  |                         |                          |                                   | 0.153                    |                        | 0.001      | 0.007              | 0.205       | 0.104              |                    |                            |                         |

ANOVA table produced with experimental data of UV treated olive plants belonging to two different varieties compared to the control and analysed in four different dates. When a chemical component was not detected in both varieties in every date only the variables treatment and date were used with a lost in degrees of freedom into the ANOVA and consequent missing data in the table.
