# Supplementary material for: Chemical Profiling of Two Italian Olea europaea (L.) Varieties Subjected to UV-B Stress
Source: MDPI journal article supplement (doi:10.3390/plants11050680), 2022-03-02
Supplement: s1 [file s1]

|                            | Neophytadiene | AlphaDMannopyranose | DSorbitol   | AlphaDTalopyranose | PalmiticAcid | Phytol      | AlphaLinolenic Acid | StearicAcid | alkane1     | alkane2     | alkane3     | BetaAmyrin  | alkane4     | Lupeolderivatives | Oleonicacidderivative | alkane5     | UrsolicAcid |
|----------------------------|---------------|---------------------|-------------|--------------------|--------------|-------------|---------------------|-------------|-------------|-------------|-------------|-------------|-------------|-------------------|-----------------------|-------------|-------------|
| Control                    | 0.495±0.010   | 0.110±0.002         | 0.129±0.001 | 0.123±0.003        | 2.942±0.039  | 0.351±0.004 | 3.097±0.052         | 2.655±0.034 | 0.916±0.091 | 1.296±0.127 | 1.868±0.174 | 0.499±0.029 | 0.688±0.016 | 1.522±0.056       | 1.360±0.063           | 0.644±0.032 | 1.122±0.018 |
| Treated UVB                | 0.546±0.021   | 0.150±0.012         | 0.208±0.030 | 0.173±0.016        | 3.729±0.115  | 0.412±0.011 | 3.937±0.129         | 3.393±0.102 | 1.162±0.127 | 1.849±0.179 | 2.505±0.217 | 0.679±0.031 | 0.917±0.035 | 1.719±0.065       | 1.265±0.085           | 1.398±0.110 | 1.517±0.050 |
| <b>TREATMENT</b>           |               |                     |             |                    |              |             |                     |             |             |             |             |             |             |                   |                       |             |             |
| <b>p=</b>                  | 0.019         | 0.002               | 0.010       | 0.003              | 0.000        | 0.000       | 0.000               | 0.000       | 0.003       | 0.000       | 0.000       | 0.000       | 0.000       | 0.007             | 0.312                 | 0.000       | 0.000       |
| Seggianeese                | 0.554±0.014   | 0.133±0.005         | 0.151±0.007 | 0.153±0.007        | 3.214±0.079  | 0.374±0.008 | 3.312±0.088         | 2.952±0.074 | 0.580±0.020 | 0.948±0.059 | 1.387±0.079 | 0.469±0.023 | 0.739±0.026 | 1.480±0.050       | 1.144±0.034           | 1.015±0.079 | 1.287±0.051 |
| Giarraffa                  | 0.487±0.017   | 0.127±0.012         | 0.186±0.031 | 0.143±0.016        | 3.457±0.144  | 0.389±0.012 | 3.722±0.153         | 3.096±0.132 | 1.498±0.083 | 2.196±0.132 | 2.986±0.156 | 0.708±0.027 | 0.866±0.040 | 1.760±0.063       | 1.480±0.089           | 1.027±0.138 | 1.352±0.060 |
| <b>VARIETY</b>             |               |                     |             |                    |              |             |                     |             |             |             |             |             |             |                   |                       |             |             |
| <b>p=</b>                  | 0.003         | 0.635               | 0.243       | 0.550              | 0.046        | 0.204       | 0.003               | 0.135       | 0.000       | 0.000       | 0.000       | 0.000       | 0.001       | 0.000             | 0.001                 | 0.920       | 0.225       |
| Seggianeese C              | 0.531±0.010   | 0.119±0.001         | 0.128±0.001 | 0.135±0.001        | 2.863±0.027  | 0.342±0.003 | 2.919±0.022         | 2.634±0.033 | 0.486±0.004 | 0.694±0.007 | 1.046±0.014 | 0.364±0.004 | 0.621±0.005 | 1.273±0.026       | 1.112±0.046           | 0.715±0.056 | 1.072±0.019 |
| Seggianeese UVB            | 0.577±0.024   | 0.148±0.009         | 0.174±0.011 | 0.171±0.012        | 3.566±0.055  | 0.406±0.009 | 3.704±0.062         | 3.271±0.056 | 0.673±0.010 | 1.203±0.051 | 1.728±0.068 | 0.573±0.017 | 0.858±0.017 | 1.687±0.047       | 1.177±0.051           | 1.315±0.080 | 1.501±0.044 |
| Giarraffa C                | 0.459±0.009   | 0.101±0.003         | 0.130±0.003 | 0.111±0.002        | 3.022±0.066  | 0.360±0.008 | 3.275±0.072         | 2.676±0.060 | 1.345±0.029 | 1.898±0.042 | 2.689±0.059 | 0.633±0.014 | 0.755±0.016 | 1.770±0.036       | 1.608±0.058           | 0.573±0.012 | 1.171±0.024 |
| Giarraffa UVB              | 0.515±0.032   | 0.153±0.022         | 0.242±0.058 | 0.175±0.030        | 3.891±0.218  | 0.418±0.019 | 4.169±0.237         | 3.515±0.194 | 1.650±0.154 | 2.495±0.235 | 3.282±0.286 | 0.784±0.042 | 0.976±0.064 | 1.750±0.124       | 1.353±0.163           | 1.480±0.206 | 1.532±0.091 |
| <b>TREATMENT x VARIETY</b> |               |                     |             |                    |              |             |                     |             |             |             |             |             |             |                   |                       |             |             |
| <b>p=</b>                  | 0.802         | 0.356               | 0.267       | 0.381              | 0.484        | 0.815       | 0.672               | 0.346       | 0.457       | 0.721       | 0.768       | 0.721       | 0.806       | 0.008             | 0.092                 | 0.185       | 0.524       |
| T2                         | 0.456±0.002   | 0.107±0.001         | 0.121±0.001 | 0.116±0.001        | 3.046±0.002  | 0348±0.001  | 3.192±0.003         | 2.797±0.001 | 0.879±0.002 | 1.309±0.004 | 1.840±0.006 | 0.519±0.002 | 0.701±0.002 | 1.436±0.007       | 1.185±0.035           | 0.812±0.025 | 1.184±0.007 |
| T4                         | 0.530±0.002   | 0.118±0.001         | 0.137±0.001 | 0.129±0.001        | 3.408±0.002  | 0.386±0.001 | 3.614±0.003         | 3.030±0.001 | 1.066±0.002 | 1.639±0.004 | 2.287±0.006 | 0.619±0.002 | 0.816±0.002 | 1.701±0.007       | 1.390±0.035           | 0.977±0.025 | 1.311±0.007 |
| T6                         | 0.561±0.002   | 0.122±0.001         | 0.153±0.001 | 0.141±0.001        | 3.159±0.002  | 0.374±0.001 | 3.364±0.003         | 2.807±0.001 | 0.939±0.002 | 1.494±0.004 | 2.121±0.006 | 0.576±0.002 | 0.787±0.002 | 1.745±0.007       | 1.496±0.035           | 0.945±0.025 | 1.309±0.007 |
| T8                         | 0.535±0.002   | 0.175±0.001         | 0.262±0.001 | 0.205±0.001        | 3.729±0.002  | 0.417±0.001 | 3.897±0.003         | 3.401±0.001 | 1.271±0.002 | 1.847±0.004 | 2.498±0.006 | 0.640±0.002 | 0.906±0.002 | 1.599±0.007       | 1.179±0.035           | 1.349±0.025 | 1.472±0.007 |
| <b>TIME</b>                |               |                     |             |                    |              |             |                     |             |             |             |             |             |             |                   |                       |             |             |
| <b>p=</b>                  | 0.000         | 0.000               | 0.000       | 0.000              | 0.000        | 0.000       | 0.000               | 0.000       | 0.000       | 0.000       | 0.000       | 0.000       | 0.000       | 0.000             | 0.000                 | 0.000       | 0.000       |
| <b>TREATMENT x TIME</b>    |               |                     |             |                    |              |             |                     |             |             |             |             |             |             |                   |                       |             |             |
| <b>p=</b>                  | 0.000         | 0.000               | 0.000       | 0.000              | 0.000        | 0.000       | 0.000               | 0.000       | 0.000       | 0.000       | 0.000       | 0.000       | 0.000       | 0.000             | 0.000                 | 0.000       | 0.000       |
| <b>VARIETY x TIME</b>      |               |                     |             |                    |              |             |                     |             |             |             |             |             |             |                   |                       |             |             |
| <b>p=</b>                  | 0.000         | 0.000               | 0.000       | 0.000              | 0.000        | 0.000       | 0.000               | 0.000       | 0.000       | 0.000       | 0.000       | 0.000       | 0.000       | 0.000             | 0.000                 | 0.000       | 0.000       |

ANOVA table produced with experimental data of UV treated olive plants belonging to two different varieties compared to the control and analysed in four different dates.
